# Supplementary material for: Fluorescence properties of systems with multiple Förster transfer pairs
Source: Royal Society of Chemistry journal article supplement (doi:10.1039/b717210a), 2008-01-01
Supplement: b717210a.pdf [file b717210a.pdf]

## **Supplementary Information**

### **Fluorescence Properties of Systems with Multiple Förster Transfer Pairs**

Zhong-Jie Jiang, Werner A. Goedel\*

Physical Chemistry, Chemnitz University of Technology,

**Table S-1: list of abbreviations**

|                                                 |                                                                                                                                                      |
|-------------------------------------------------|------------------------------------------------------------------------------------------------------------------------------------------------------|
| $I_{\text{transmitted}}$                        | transmitted light                                                                                                                                    |
| $I_{\text{incident}}$                           | incident light                                                                                                                                       |
| $I_{\text{detected}}$                           | the intensities of (fluorescence) light detected at the detector                                                                                     |
| $d$                                             | length of the optical path through the sample                                                                                                        |
| $i, j$                                          | indices signifying individual dyes, e.g. dye 1, dye 2, etc.;                                                                                         |
| $\epsilon_i$                                    | molar absorption coefficient of dye $i$                                                                                                              |
| $c_i$                                           | molar concentration of the dye $i$ .                                                                                                                 |
| $\lambda$                                       | wavelength                                                                                                                                           |
| $f_i(\lambda)$                                  | fluorescence quantum yield of emission within a wavelength range of $\lambda$ and $\lambda+d\lambda$ .                                               |
| $\lambda_\alpha, \lambda_\beta, \lambda_\gamma$ | predefined wavelengths chosen by the experimentalist to characterize the fluorescent properties of his system.                                       |
| $R_\alpha, R_\beta, R_\gamma$                   | intensity ratios chosen by the experimentalist                                                                                                       |
| $F_i(\lambda)$                                  | fluorescence efficiency; comprises $f_i(\lambda)$ and all those instrumentation parameters that will cancel out in Eq. (7)-(9).                      |
| $p_{ij}$                                        | probability of Förster transfer of excitation from Donor $i$ to acceptor $j$                                                                         |
| $(1-p_{ij})$                                    | probability of deactivation of the donor via either spontaneous emission or non-radiative decay                                                      |
| $\tau_D$                                        | lifetime of the excited state of the donor in absence of the acceptor,                                                                               |
| $n_{D \rightarrow A}$                           | rate of transfer from donor to acceptor                                                                                                              |
| $r_{ij}$                                        | Förster radius, the distance between donor and acceptor at which the rate of transfer is equal to the rate of deactivation of the donor              |
| $c_{ij}$                                        | critical transfer concentration [molecules per volume] characteristic for donor-acceptor pair $i \rightarrow j$                                      |
| $K_i$                                           | rate constant for quenching (Stern Vollmer eq.)                                                                                                      |
| $p_{ii}$                                        | probability for self-quenching of the donor                                                                                                          |
| $P_i$                                           | probability (in presence of self quenching) of the excitation neither being transferred from an excited donor to an acceptor nor being self-quenched |
| $P_{ij}$                                        | probability of energy transfer from the donor $i$ to the acceptor $j$ (in Presence of self quenching or other acceptors than $j$ )                   |
| $g_{ij}$                                        | probability that excitation transferred from donor $i$ to acceptor $j$ is emitted as light.                                                          |
| $p_{jj}$                                        | probability of self-quenching of the acceptor.                                                                                                       |
| FL                                              | Fluorescein                                                                                                                                          |
| ES                                              | Eosin                                                                                                                                                |
| RB                                              | Rhodamine B                                                                                                                                          |
| AOT                                             | bis(2-ethylhexyl) sulfosuccinate sodium salt                                                                                                         |

Table S-2a:

**R<sub>a</sub> as a function of C<sub>2</sub> and C<sub>3</sub>**

(Datasets graphically represented in figure 11a)

Upper line: exponential representation

Middle line: Stern-Vollmer equation

Bottom line: experimental data

|                                                        |       | C <sub>2</sub> [10 <sup>-5</sup> mol L <sup>-1</sup> ] |       |       |       |       |       |       |
|--------------------------------------------------------|-------|--------------------------------------------------------|-------|-------|-------|-------|-------|-------|
|                                                        |       | 0                                                      | 1     | 2     | 3     | 4     | 5     | 6     |
| C <sub>3</sub> [10 <sup>-5</sup> mol L <sup>-1</sup> ] | 0     | 0.748                                                  | 0.662 | 0.593 | 0.536 | 0.487 | 0.446 | 0.410 |
|                                                        |       | 0.749                                                  | 0.663 | 0.594 | 0.538 | 0.492 | 0.453 | 0.419 |
|                                                        |       | 0.752                                                  | 0.663 | 0.602 | 0.543 | 0.490 | 0.457 | 0.423 |
|                                                        | 2     | 0.688                                                  | 0.616 | 0.556 | 0.505 | 0.462 | 0.424 | 0.392 |
|                                                        |       | 0.693                                                  | 0.621 | 0.563 | 0.514 | 0.473 | 0.437 | 0.406 |
|                                                        |       | 0.713                                                  | 0.620 | -     | -     | -     | -     | -     |
|                                                        | 4     | 0.641                                                  | 0.579 | 0.526 | 0.481 | 0.441 | 0.407 | 0.377 |
|                                                        |       | 0.648                                                  | 0.587 | 0.536 | 0.493 | 0.455 | 0.423 | 0.394 |
|                                                        |       | 0.674                                                  | -     | 0.543 | -     | -     | -     | -     |
|                                                        | 6     | 0.603                                                  | 0.547 | 0.5   | 0.459 | 0.423 | 0.391 | 0.363 |
|                                                        |       | 0.610                                                  | 0.556 | 0.512 | 0.473 | 0.439 | 0.409 | 0.383 |
|                                                        |       | 0.635                                                  | -     | -     | 0.486 | -     | -     | -     |
| 8                                                      | 0.569 | 0.520                                                  | 0.477 | 0.439 | 0.406 | 0.376 | 0.350 |       |
|                                                        | 0.576 | 0.529                                                  | 0.489 | 0.454 | 0.423 | 0.395 | 0.371 |       |
|                                                        | 0.603 | -                                                      | -     | -     | 0.435 | -     | -     |       |
| 10                                                     | 0.539 | 0.494                                                  | 0.455 | 0.420 | 0.390 | 0.362 | 0.338 |       |
|                                                        | 0.547 | 0.505                                                  | 0.468 | 0.436 | 0.407 | 0.382 | 0.359 |       |
|                                                        | 0.568 | -                                                      | -     | -     | -     | 0.399 | -     |       |
| 12                                                     | 0.512 | 0.471                                                  | 0.435 | 0.403 | 0.374 | 0.349 | 0.325 |       |
|                                                        | 0.520 | 0.482                                                  | 0.449 | 0.419 | 0.392 | 0.369 | 0.347 |       |
|                                                        | 0.541 | -                                                      | -     | -     | -     | -     | 0.359 |       |

Table S-2b:

**$R_\beta$  as a function of  $C_2$  and  $C_3$**

(Datasets graphically represented in figure 11b)

Upper line: exponential representation

Middle line: Stern-Vollmer equation

Bottom line: experimental data

|                                   |              | $C_2$ [ $10^{-5}$ mol L $^{-1}$ ] |              |              |              |              |              |              |
|-----------------------------------|--------------|-----------------------------------|--------------|--------------|--------------|--------------|--------------|--------------|
|                                   |              | 0                                 | 1            | 2            | 3            | 4            | 5            | 6            |
| $C_3$ [ $10^{-5}$ mol L $^{-1}$ ] | 0            | <b>0.208</b>                      | <b>0.275</b> | <b>0.329</b> | <b>0.373</b> | <b>0.411</b> | <b>0.443</b> | <b>0.471</b> |
|                                   |              | <b>0.207</b>                      | <b>0.274</b> | <b>0.328</b> | <b>0.371</b> | <b>0.408</b> | <b>0.438</b> | <b>0.465</b> |
|                                   |              | <b>0.206</b>                      | <b>0.274</b> | <b>0.325</b> | <b>0.368</b> | <b>0.410</b> | <b>0.440</b> | <b>0.466</b> |
|                                   | 2            | <b>0.204</b>                      | <b>0.261</b> | <b>0.308</b> | <b>0.348</b> | <b>0.382</b> | <b>0.411</b> | <b>0.436</b> |
|                                   |              | <b>0.200</b>                      | <b>0.256</b> | <b>0.303</b> | <b>0.341</b> | <b>0.373</b> | <b>0.401</b> | <b>0.426</b> |
|                                   |              | <b>0.186</b>                      | <b>0.253</b> |              |              |              |              |              |
|                                   | 4            | <b>0.198</b>                      | <b>0.248</b> | <b>0.29</b>  | <b>0.325</b> | <b>0.355</b> | <b>0.382</b> | <b>0.405</b> |
|                                   |              | <b>0.194</b>                      | <b>0.242</b> | <b>0.282</b> | <b>0.316</b> | <b>0.346</b> | <b>0.371</b> | <b>0.393</b> |
|                                   |              | <b>0.172</b>                      |              | <b>0.272</b> |              |              |              |              |
|                                   | 6            | <b>0.191</b>                      | <b>0.235</b> | <b>0.273</b> | <b>0.305</b> | <b>0.332</b> | <b>0.357</b> | <b>0.378</b> |
|                                   |              | <b>0.188</b>                      | <b>0.23</b>  | <b>0.266</b> | <b>0.296</b> | <b>0.322</b> | <b>0.345</b> | <b>0.365</b> |
|                                   |              | <b>0.159</b>                      |              |              | <b>0.276</b> |              |              |              |
| 8                                 | <b>0.185</b> | <b>0.224</b>                      | <b>0.258</b> | <b>0.287</b> | <b>0.312</b> | <b>0.334</b> | <b>0.354</b> |              |
|                                   | <b>0.184</b> | <b>0.221</b>                      | <b>0.252</b> | <b>0.279</b> | <b>0.302</b> | <b>0.323</b> | <b>0.341</b> |              |
|                                   | <b>0.147</b> |                                   |              |              | <b>0.281</b> |              |              |              |
| 10                                | <b>0.179</b> | <b>0.214</b>                      | <b>0.244</b> | <b>0.271</b> | <b>0.294</b> | <b>0.314</b> | <b>0.332</b> |              |
|                                   | <b>0.18</b>  | <b>0.212</b>                      | <b>0.24</b>  | <b>0.264</b> | <b>0.285</b> | <b>0.303</b> | <b>0.320</b> |              |
|                                   | <b>0.137</b> |                                   |              |              |              | <b>0.279</b> |              |              |
| 12                                | <b>0.174</b> | <b>0.205</b>                      | <b>0.232</b> | <b>0.256</b> | <b>0.277</b> | <b>0.296</b> | <b>0.312</b> |              |
|                                   | <b>0.176</b> | <b>0.205</b>                      | <b>0.229</b> | <b>0.251</b> | <b>0.270</b> | <b>0.286</b> | <b>0.302</b> |              |
|                                   | <b>0.128</b> |                                   |              |              |              |              | <b>0.270</b> |              |

Table S-2c:

**R<sub>γ</sub> as a function of C<sub>2</sub> and C<sub>3</sub>**

(Datasets graphically represented in figure 11c)

Upper line: exponential representation

Middle line: Stern-Vollmer equation

Bottom line: experimental data

|                                                        |       | C <sub>2</sub> [10 <sup>-5</sup> mol L <sup>-1</sup> ] |       |       |       |       |       |       |
|--------------------------------------------------------|-------|--------------------------------------------------------|-------|-------|-------|-------|-------|-------|
|                                                        |       | 0                                                      | 1     | 2     | 3     | 4     | 5     | 6     |
| C <sub>3</sub> [10 <sup>-5</sup> mol L <sup>-1</sup> ] | 0     | 0.044                                                  | 0.063 | 0.078 | 0.09  | 0.102 | 0.111 | 0.120 |
|                                                        |       | 0.044                                                  | 0.063 | 0.078 | 0.09  | 0.101 | 0.109 | 0.117 |
|                                                        |       | 0.042                                                  | 0.063 | 0.073 | 0.089 | 0.100 | 0.103 | 0.116 |
|                                                        | 2     | 0.109                                                  | 0.123 | 0.136 | 0.147 | 0.156 | 0.165 | 0.173 |
|                                                        |       | 0.108                                                  | 0.122 | 0.134 | 0.145 | 0.154 | 0.161 | 0.168 |
|                                                        |       | 0.101                                                  | 0.127 | -     | -     | -     | -     | -     |
|                                                        | 4     | 0.161                                                  | 0.173 | 0.184 | 0.194 | 0.203 | 0.211 | 0.218 |
|                                                        |       | 0.159                                                  | 0.171 | 0.182 | 0.191 | 0.199 | 0.206 | 0.213 |
|                                                        |       | 0.155                                                  | -     | 0.185 | -     | -     | -     | -     |
|                                                        | 6     | 0.206                                                  | 0.217 | 0.227 | 0.236 | 0.245 | 0.252 | 0.259 |
|                                                        |       | 0.202                                                  | 0.213 | 0.223 | 0.231 | 0.239 | 0.246 | 0.252 |
|                                                        |       | 0.206                                                  | -     | -     | 0.238 | -     | -     | -     |
| 8                                                      | 0.246 | 0.256                                                  | 0.266 | 0.274 | 0.282 | 0.29  | 0.296 |       |
|                                                        | 0.24  | 0.25                                                   | 0.259 | 0.268 | 0.275 | 0.282 | 0.288 |       |
|                                                        | 0.250 | -                                                      | -     | -     | 0.284 | -     | -     |       |
| 10                                                     | 0.282 | 0.291                                                  | 0.3   | 0.309 | 0.317 | 0.324 | 0.331 |       |
|                                                        | 0.273 | 0.283                                                  | 0.292 | 0.3   | 0.308 | 0.315 | 0.321 |       |
|                                                        | 0.295 | -                                                      | -     | -     | -     | 0.322 | -     |       |
| 12                                                     | 0.314 | 0.324                                                  | 0.333 | 0.341 | 0.349 | 0.356 | 0.362 |       |
|                                                        | 0.303 | 0.313                                                  | 0.322 | 0.33  | 0.338 | 0.345 | 0.351 |       |
|                                                        | 0.331 | -                                                      | -     | -     | -     | -     | 0.372 |       |

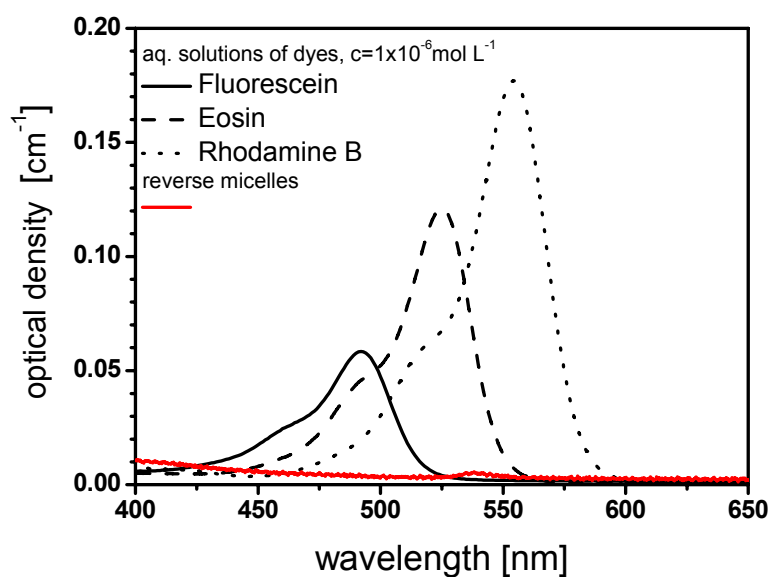

**Figure S-1:**

Comparison of the optical density [=  $\lg(I_0/I)/(\text{path length})$ ] of diluted aqueous solution of the dyes used in the experiments to the optical density of a dispersion of reverse micelles in isooctane prepared at identical conditions as described in the main paper: in the experiments conducted here, attenuation due to scattering is negligible compared to attenuation due to absorption.
